# Supplementary material for: Oral Microbiota in Infants Fed a Formula Supplemented with Bovine Milk Fat Globule Membranes - A Randomized Controlled Trial
Source: PubMed Central journal article supplement (PMC5242539; doi:10.1371/journal.pone.0169831), 2017-01-18
Supplement: pone.0169831.s004.pdf [file pone.0169831.s004.pdf]

**S1 Table. Mean prevalence of phyla and genera sequences.** Data are shown in % of all sequences or % of the children where the phylum/genus was detected. Red p-value indicates phyla/genera with a statistically significant difference ( $p < 0,008$ ) between groups.

| Phylum/Genus            | % of total number of sequenced |               |               |                  |               |               |               |              | % infants with detection |     |     |              |          |     |     |              |
|-------------------------|--------------------------------|---------------|---------------|------------------|---------------|---------------|---------------|--------------|--------------------------|-----|-----|--------------|----------|-----|-----|--------------|
|                         | 4 month                        |               |               |                  | 12 month      |               |               |              | 4 month                  |     |     |              | 12 month |     |     |              |
|                         | BFR                            | EF            | SF            | p-value          | BFR           | EF            | SF            | p-value      | BFR                      | EF  | SF  | p-value      | BFR      | EF  | SF  | p-value      |
| <b>Actinobacteria</b>   | <b>7.850</b>                   | <b>11.230</b> | <b>14.660</b> | <b>0.057</b>     | <b>17.898</b> | <b>10.270</b> | <b>11.824</b> | <b>0.001</b> | 100                      | 100 | 100 | 1.000        | 100      | 100 | 100 | 1.000        |
| Actinomyces             | 1.490                          | 2.720         | 2.603         | 0.078            | 1.611         | 1.250         | 1.130         | 0.088        | 100                      | 100 | 100 | 1.000        | 100      | 100 | 100 | 1.000        |
| Atopobium               | 0.268                          | 0.304         | 0.277         | 0.972            | 0.026         | 0.031         | 0.027         | 0.795        | 73                       | 87  | 98  | <b>0.007</b> | 81       | 85  | 89  | 0.484        |
| Bifidobacterium         | 0.002                          | 0.000         | 0.000         | 0.012            | 0.000         | 0.000         | 0.000         | 0.406        | 24                       | 2   | 5   | <b>0.001</b> | 0        | 2   | 0   | 0.402        |
| Corynebacterium         | 0.218                          | 0.040         | 0.036         | 0.459            | 0.225         | 0.244         | 0.497         | 0.160        | 41                       | 43  | 49  | 0.757        | 75       | 81  | 86  | 0.387        |
| Kocuria                 | 0.001                          | 0.003         | 0.077         | 0.379            | 0.018         | 0.001         | 0.013         | 0.494        | 22                       | 9   | 20  | 0.218        | 21       | 15  | 23  | 0.514        |
| Rothia                  | 5.866                          | 8.164         | 11.668        | 0.089            | 16.018        | 8.744         | 10.151        | <b>0.001</b> | 100                      | 100 | 100 | 1.000        | 100      | 100 | 100 | 1.000        |
| Scardovia               | 0.002                          | 0.000         | 0.000         | 0.18             | 0.000         | 0.000         | 0.000         | 0.403        | 5                        | 2   | 2   | 0.668        | 0        | 2   | 4   | 0.368        |
| <b>Bacteroidetes</b>    | <b>0.680</b>                   | <b>8.310</b>  | <b>5.930</b>  | <b>&lt;0.001</b> | <b>3.744</b>  | <b>6.068</b>  | <b>6.807</b>  | <b>0.001</b> | 100                      | 100 | 100 | 1.000        | 100      | 100 | 100 | 1.000        |
| Alloprevotella          | 0.245                          | 4.907         | 2.502         | <b>&lt;0.001</b> | 1.524         | 2.594         | 2.179         | 0.105        | 100                      | 100 | 100 | 1.000        | 100      | 100 | 100 | 1.000        |
| Bergeyella              | 0.012                          | 0.009         | 0.012         | 0.793            | 0.057         | 0.061         | 0.065         | 0.804        | 49                       | 48  | 51  | 0.948        | 92       | 98  | 100 | 0.051        |
| Capnocytophaga          | 0.000                          | 0.000         | 0.000         | 0.957            | 0.026         | 0.056         | 0.057         | 0.378        | 5                        | 9   | 7   | 0.848        | 81       | 85  | 89  | 0.484        |
| Porphyromonas           | 0.152                          | 0.192         | 0.051         | 0.166            | 0.767         | 1.085         | 1.219         | 0.067        | 81                       | 89  | 71  | 0.095        | 100      | 100 | 100 | 1.000        |
| Prevotella              | 0.268                          | 3.208         | 3.366         | <b>0.002</b>     | 1.369         | 2.271         | 2.551         | 0.036        | 97                       | 100 | 100 | 0.306        | 100      | 100 | 100 | 1.000        |
| Tannerella              | 0.000                          | 0.000         | 0.000         | 0.432            | 0.000         | 0.002         | 0.002         | 0.241        | 3                        | 4   | 0   | 0.416        | 12       | 25  | 29  | 0.072        |
| <b>Firmicutes</b>       | <b>87.000</b>                  | <b>72.670</b> | <b>72.770</b> | <b>&lt;0.001</b> | <b>58.586</b> | <b>59.668</b> | <b>61.034</b> | <b>0.598</b> | 100                      | 100 | 100 | 1.000        | 100      | 100 | 100 | 1.000        |
| Abiotrophia             | 0.000                          | 0.000         | 0.000         | 0.153            | 0.127         | 0.136         | 0.191         | 0.442        | 3                        | 15  | 7   | 0.125        | 69       | 73  | 91  | 0.014        |
| Catonella               | 0.001                          | 0.002         | 0.002         | 0.251            | 0.006         | 0.009         | 0.008         | 0.291        | 8                        | 20  | 27  | 0.102        | 62       | 78  | 71  | 0.166        |
| Clostridiales[F-2][G-1] | 0.000                          | 0.000         | 0.001         | 0.143            | 0.009         | 0.015         | 0.009         | 0.269        | 0                        | 7   | 12  | 0.091        | 54       | 73  | 51  | 0.034        |
| Clostridiales[F-2][G-2] | 0.000                          | 0.001         | 0.002         | 0.125            | 0.003         | 0.004         | 0.005         | 0.329        | 5                        | 7   | 12  | 0.486        | 46       | 49  | 58  | 0.427        |
| Dialister               | 0.000                          | 0.000         | 0.002         | 0.018            | 0.000         | 0.000         | 0.000         | 0.028        | 0                        | 0   | 10  | 0.015        | 0        | 14  | 6   | 0.015        |
| Dolosigranulum          | 0.000                          | 0.000         | 0.000         | NA               | 0.001         | 0.000         | 0.000         | 0.500        | 0                        | 0   | 0   | 1.000        | 2        | 9   | 2   | 0.128        |
| Enterococcus            | 0.000                          | 0.000         | 0.000         | 0.432            | 0.000         | 0.001         | 0.001         | 0.082        | 0                        | 2   | 0   | 0.425        | 6        | 27  | 27  | <b>0.007</b> |
| Eubacterium [11][G-7]   | 0.000                          | 0.000         | 0.001         | 0.408            | 0.004         | 0.002         | 0.006         | 0.374        | 5                        | 2   | 15  | 0.072        | 23       | 27  | 27  | 0.054        |
| Eubacterium[11][G-1]    | 0.000                          | 0.002         | 0.001         | 0.306            | 0.007         | 0.007         | 0.006         | 0.953        | 0                        | 4   | 12  | 0.059        | 37       | 53  | 44  | 0.235        |
| Finegoldia              | 0.001                          | 0.000         | 0.001         | 0.19             | 0.000         | 0.000         | 0.000         | 0.635        | 11                       | 0   | 10  | 0.079        | 0        | 2   | 2   | 0.629        |
| Gemella                 | 3.339                          | 2.394         | 1.956         | 0.048            | 3.156         | 4.445         | 4.486         | <b>0.002</b> | 100                      | 100 | 100 | 1.000        | 100      | 100 | 100 | 1.000        |
| Granulicatella          | 1.214                          | 2.666         | 1.788         | 0.028            | 5.678         | 5.581         | 5.598         | 0.950        | 100                      | 100 | 100 | 1.000        | 100      | 100 | 100 | 1.000        |

|                       |              |              |              |              |               |               |               |              |            |            |            |              |            |            |            |              |
|-----------------------|--------------|--------------|--------------|--------------|---------------|---------------|---------------|--------------|------------|------------|------------|--------------|------------|------------|------------|--------------|
| Lachnoanaerobaculum   | 0.036        | 0.192        | 0.274        | 0.013        | 0.218         | 0.237         | 0.223         | 0.883        | 59         | 91         | 98         | <0.001       | 98         | 100        | 98         | 0.572        |
| Lachnospiraceae [G-3] | 0.000        | 0.000        | 0.000        | 0.444        | 0.004         | 0.005         | 0.011         | 0.251        | 3          | 0          | 2          | 0.547        | 25         | 53         | 36         | 0.011        |
| Lachnospiraceae[G-2]  | 0.000        | 0.077        | 0.113        | 0.04         | 0.021         | 0.024         | 0.022         | 0.888        | 8          | 52         | 56         | <0.001       | 79         | 76         | 82         | 0.769        |
| Lactobacillus         | 0.012        | 0.002        | 0.001        | 0.092        | 0.000         | 0.000         | 0.000         | 0.099        | 51         | 39         | 27         | 0.085        | 0          | 15         | 7          | 0.011        |
| Megasphaera           | 0.001        | 0.016        | 0.038        | 0.052        | 0.001         | 0.001         | 0.000         | 0.129        | 8          | 39         | 51         | <0.001       | 13         | 31         | 11         | 0.014        |
| Mogibacterium         | 0.000        | 0.004        | 0.006        | 0.009        | 0.003         | 0.004         | 0.004         | 0.625        | 3          | 39         | 56         | <0.001       | 33         | 54         | 44         | 0.074        |
| Oribacterium          | 0.001        | 0.004        | 0.010        | 0.048        | 0.045         | 0.031         | 0.045         | 0.196        | 5          | 37         | 44         | <0.001       | 98         | 98         | 89         | 0.036        |
| Parvimonas            | 0.000        | 0.001        | 0.000        | 0.268        | 0.000         | 0.001         | 0.002         | 0.251        | 11         | 11         | 5          | 0.547        | 6          | 15         | 24         | 0.036        |
| Peptococcus           | 0.000        | 0.007        | 0.001        | 0.234        | 0.016         | 0.030         | 0.020         | 0.144        | 0          | 13         | 7          | 0.075        | 50         | 71         | 64         | 0.069        |
| Peptostreptococcus    | 0.000        | 0.002        | 0.003        | 0.105        | 0.018         | 0.017         | 0.018         | 0.911        | 0          | 20         | 20         | 0.016        | 69         | 85         | 78         | 0.146        |
| Selenomonas           | 0.000        | 0.001        | 0.003        | 0.289        | 0.001         | 0.005         | 0.002         | 0.242        | 8          | 11         | 22         | 0.161        | 10         | 24         | 33         | 0.050        |
| Solobacterium         | 0.001        | 0.040        | 0.035        | 0.088        | 0.043         | 0.088         | 0.057         | 0.071        | 14         | 76         | 90         | <0.001       | 85         | 97         | 95         | 0.046        |
| Staphylococcus        | 0.007        | 0.006        | 0.017        | 0.533        | 0.002         | 0.004         | 0.004         | 0.203        | 43         | 54         | 44         | 0.510        | 25         | 63         | 65         | <0.001       |
| Stomatobaculum        | 0.004        | 0.009        | 0.027        | 0.011        | 0.035         | 0.052         | 0.037         | 0.295        | 16         | 57         | 61         | <0.001       | 73         | 85         | 82         | 0.285        |
| Streptococcus         | 79.752       | 56.984       | 59.206       | <0.001       | 46.330        | 45.753        | 47.209        | 0.806        | 100        | 100        | 100        | 1.000        | 100        | 100        | 100        | 1.000        |
| Veillonella           | 2.680        | 10.324       | 9.279        | <0.001       | 2.861         | 3.215         | 3.126         | 0.692        | 100        | 100        | 100        | 1.000        | 100        | 100        | 100        | 1.000        |
| <b>Fusobacteria</b>   | <b>1.163</b> | <b>1.408</b> | <b>1.601</b> | <b>0.875</b> | <b>2.819</b>  | <b>4.339</b>  | <b>3.902</b>  | <b>0.057</b> | <b>89</b>  | <b>98</b>  | <b>98</b>  | <b>0.130</b> | <b>100</b> | <b>100</b> | <b>100</b> | <b>1.000</b> |
| Fusobacterium         | 0.678        | 0.430        | 0.449        | 0.707        | 1.630         | 2.887         | 2.777         | 0.033        | 84         | 98         | 95         | 0.038        | 100        | 100        | 100        | 1.000        |
| Leptotrichia          | 0.489        | 0.977        | 1.152        | 0.656        | 1.189         | 1.452         | 1.125         | 0.564        | 46         | 96         | 95         | <0.001       | 100        | 100        | 100        | 1.000        |
| <b>GN02</b>           | <b>0.000</b> | <b>0.000</b> | <b>0.000</b> | <b>NA</b>    | <b>0.000</b>  | <b>0.000</b>  | <b>0.000</b>  | <b>0.614</b> | <b>0</b>   | <b>0</b>   | <b>0</b>   | <b>1.000</b> | <b>2</b>   | <b>2</b>   | <b>5</b>   | <b>0.431</b> |
| GN02[G-1]             | 0.000        | 0.000        | 0.000        | NA           | 0.000         | 0.000         | 0.001         | 0.614        | 0          | 0          | 0          | 1.000        | 2          | 2          | 5          | 0.431        |
| <b>Proteobacteria</b> | <b>3.250</b> | <b>6.361</b> | <b>5.020</b> | <b>0.286</b> | <b>16.917</b> | <b>19.598</b> | <b>17.098</b> | <b>0.199</b> | <b>100</b> | <b>100</b> | <b>100</b> | <b>1.000</b> | <b>100</b> | <b>100</b> | <b>100</b> | <b>1.000</b> |
| Aggregatibacter       | 0.001        | 0.003        | 0.001        | 0.328        | 0.031         | 0.033         | 0.101         | 0.035        | 19         | 24         | 22         | 0.860        | 52         | 61         | 80         | 0.008        |
| Bradyrhizobium        | 0.001        | 0.001        | 0.001        | 0.669        | 0.000         | 0.000         | 0.000         | 0.435        | 16         | 26         | 15         | 0.341        | 4          | 2          | 6          | 0.588        |
| Campylobacter         | 0.014        | 0.028        | 0.042        | 0.181        | 0.042         | 0.054         | 0.050         | 0.390        | 32         | 83         | 90         | <0.001       | 92         | 100        | 98         | 0.050        |
| Cardiobacterium       | 0.000        | 0.000        | 0.000        | 0.55         | 0.016         | 0.012         | 0.014         | 0.759        | 3          | 0          | 2          | 0.547        | 44         | 32         | 53         | 0.084        |
| Eikenella             | 0.000        | 0.000        | 0.000        | 0.579        | 0.003         | 0.004         | 0.004         | 0.840        | 0          | 2          | 2          | 0.646        | 33         | 34         | 42         | 0.559        |
| Haemophilus           | 1.425        | 1.251        | 1.110        | 0.795        | 4.199         | 4.790         | 5.242         | 0.136        | 100        | 100        | 100        | 1.000        | 100        | 100        | 100        | 1.000        |
| Kingella              | 0.000        | 0.000        | 0.000        | 0.354        | 0.067         | 0.058         | 0.108         | 0.243        | 8          | 4          | 0          | 0.190        | 75         | 83         | 85         | 0.349        |
| Klebsiella            | 0.000        | 0.002        | 0.000        | 0.101        | 0.000         | 0.004         | 0.004         | <0,001       | 0          | 7          | 0          | 0.074        | 2          | 56         | 51         | <0.001       |
| Lautropia             | 0.001        | 0.001        | 0.000        | 0.086        | 0.040         | 0.068         | 0.083         | 0.446        | 19         | 15         | 5          | 0.153        | 58         | 64         | 84         | 0.010        |
| Moraxella             | 0.000        | 0.000        | 0.001        | 0.158        | 0.004         | 0.001         | 0.001         | 0.490        | 11         | 2          | 12         | 0.176        | 10         | 10         | 18         | 0.319        |
| Neisseria             | 1.810        | 5.085        | 3.850        | 0.197        | 12.494        | 14.566        | 11.468        | 0.158        | 100        | 100        | 100        | 1.000        | 100        | 100        | 100        | 1.000        |
| Ottowia               | 0.000        | 0.000        | 0.000        | 0.366        | 0.002         | 0.002         | 0.014         | 0.313        | 0          | 0          | 2          | 0.360        | 6          | 9          | 15         | 0.286        |

|                     |              |              |              |              |              |              |              |              |           |           |           |              |           |           |           |              |
|---------------------|--------------|--------------|--------------|--------------|--------------|--------------|--------------|--------------|-----------|-----------|-----------|--------------|-----------|-----------|-----------|--------------|
| Ralstonia           | 0.001        | 0.000        | 0.000        | 0.045        | 0.000        | 0.000        | 0.000        | NA           | 27        | 9         | 10        | 0.036        | 0         | 0         | 0         | 1.000        |
| Simonsiella         | 0.000        | 0.001        | 0.009        | 0.308        | 0.018        | 0.006        | 0.012        | 0.285        | 0         | 4         | 7         | 0.258        | 35        | 31        | 33        | 0.899        |
| Yersinia            | 0.000        | 0.001        | 0.000        | 0.292        | 0.000        | 0.000        | 0.001        | 0.076        | 0         | 4         | 0         | 0.178        | 2         | 15        | 18        | 0.023        |
| <b>Spirochaetes</b> | <b>0.000</b> | <b>0.000</b> | <b>0.000</b> | <b>NA</b>    | <b>0.000</b> | <b>0.000</b> | <b>0.002</b> | <b>0.366</b> | <b>0</b>  | <b>0</b>  | <b>0</b>  | <b>1.000</b> | <b>0</b>  | <b>12</b> | <b>7</b>  | <b>0.042</b> |
| Treponema           | 0.000        | 0.000        | 0.000        | NA           | 0.000        | 0.000        | 0.002        | 0.366        | 0         | 0         | 0         | 1.000        | 0         | 12        | 7         | 0.042        |
| <b>SR1</b>          | <b>0.000</b> | <b>0.003</b> | <b>0.002</b> | <b>0.532</b> | <b>0.017</b> | <b>0.028</b> | <b>0.035</b> | <b>0.247</b> | <b>3</b>  | <b>7</b>  | <b>10</b> | <b>0.448</b> | <b>56</b> | <b>75</b> | <b>78</b> | <b>0.025</b> |
| SR1[G-1]            | 0.000        | 0.002        | 0.002        | 0.532        | 0.017        | 0.028        | 0.035        | 0.247        | 3         | 7         | 10        | 0.448        | 56        | 75        | 78        | 0.025        |
| <b>Tenericutes</b>  | <b>0.000</b> | <b>0.000</b> | <b>0.000</b> | <b>0.513</b> | <b>0.000</b> | <b>0.001</b> | <b>0.000</b> | <b>0.039</b> | <b>0</b>  | <b>2</b>  | <b>2</b>  | <b>0.646</b> | <b>2</b>  | <b>17</b> | <b>16</b> | <b>0.026</b> |
| Mycoplasma          | 0.000        | 0.000        | 0.000        | 0.513        | 0.000        | 0.001        | 0.000        | 0.039        | 0         | 2         | 2         | 0.646        | 2         | 17        | 16        | 0.026        |
| <b>TM7</b>          | <b>0.010</b> | <b>0.008</b> | <b>0.013</b> | <b>0.824</b> | <b>0.020</b> | <b>0.027</b> | <b>0.031</b> | <b>0.514</b> | <b>16</b> | <b>39</b> | <b>41</b> | <b>0.033</b> | <b>71</b> | <b>83</b> | <b>76</b> | <b>0.326</b> |
| TM7[G-1]            | 0.010        | 0.008        | 0.013        | 0.838        | 0.020        | 0.027        | 0.031        | 0.521        | 16        | 37        | 39        | 0.057        | 71        | 80        | 76        | 0.576        |
| TM7[G-3]            | 0.000        | 0.000        | 0.000        | 0.132        | 0.000        | 0.000        | 0.000        | 0.783        | 0         | 4         | 10        | 0.131        | 6         | 9         | 7         | 0.860        |
