# Supplementary material for: Oral Microbiota in Infants Fed a Formula Supplemented with Bovine Milk Fat Globule Membranes - A Randomized Controlled Trial
Source: PubMed Central journal article supplement (PMC5242539; doi:10.1371/journal.pone.0169831), 2017-01-18
Supplement: pone.0169831.s005.pdf [file pone.0169831.s005.pdf]

**S2 Table. Proportion (% infants) with a species/phylotype detected by sequencing of oral swabs at 4 and 12 months, respectively.** EF=experimental formula, SF=standard formula, and BFR=breast-fed reference group. Grey color indicates species/phylotypes in the oral core microbiome.

| Species/phylotype<br>(alphabetical order) | 4 month |     |     | 12 month |     |     | Species/phylotype<br>(sorted by decreasing prevalence) | 4 month |     |     | 12 month |     |     |
|-------------------------------------------|---------|-----|-----|----------|-----|-----|--------------------------------------------------------|---------|-----|-----|----------|-----|-----|
|                                           | BFR     | EF  | SF  | BFR      | EF  | SF  |                                                        | BFR     | EF  | SF  | BFR      | EF  | SF  |
| <i>Abiotrophia defectiva</i>              | 3       | 15  | 7   | 69       | 73  | 91  | <i>Actinomyces</i> sp. HOT180                          | 97      | 100 | 100 | 98       | 100 | 100 |
| <i>Actinomyces graevenitzii</i>           | 62      | 93  | 85  | 90       | 97  | 95  | <i>Alloprevotella</i> sp. HOT473                       | 100     | 100 | 100 | 100      | 98  | 100 |
| <i>Actinomyces cardiffensis</i>           | 14      | 17  | 20  | 15       | 20  | 25  | <i>Gemella haemolysans</i>                             | 100     | 100 | 100 | 100      | 100 | 100 |
| <i>Actinomyces johnsonii</i>              | 3       | 4   | 2   | 31       | 29  | 45  | <i>Granulicatella elegans</i>                          | 95      | 100 | 98  | 100      | 100 | 100 |
| <i>Actinomyces massiliensis</i>           | 0       | 0   | 2   | 4        | 2   | 9   | <i>Haemophilus parainfluenzae</i>                      | 97      | 93  | 98  | 100      | 100 | 100 |
| <i>Actinomyces meyeri</i>                 | 3       | 35  | 37  | 44       | 37  | 29  | <i>Neisseria flavescens</i>                            | 95      | 100 | 100 | 100      | 100 | 100 |
| <i>Actinomyces naeslundii</i>             | 3       | 7   | 5   | 42       | 37  | 51  | <i>Prevotella melaninogenica</i>                       | 97      | 98  | 100 | 100      | 100 | 100 |
| <i>Actinomyces naeslundii</i> II          | 0       | 0   | 0   | 8        | 8   | 5   | <i>Rothia mucilaginosa</i>                             | 100     | 100 | 100 | 100      | 100 | 100 |
| <i>Actinomyces odontolyticus</i>          | 54      | 37  | 44  | 56       | 71  | 69  | <i>Streptococcus oligofermentans</i>                   | 100     | 100 | 100 | 100      | 100 | 100 |
| <i>Actinomyces oris</i>                   | 11      | 15  | 5   | 60       | 56  | 56  | <i>Streptococcus oralis</i>                            | 100     | 100 | 100 | 100      | 100 | 100 |
| <i>Actinomyces radidentis</i>             | 0       | 0   | 2   | 2        | 0   | 0   | <i>Streptococcus parasanguinis</i> I                   | 97      | 100 | 95  | 100      | 100 | 98  |
| <i>Actinomyces</i> sp. HOT170             | 3       | 0   | 0   | 12       | 14  | 15  | <i>Streptococcus parasanguinis</i> II                  | 100     | 100 | 100 | 98       | 97  | 98  |
| <i>Actinomyces</i> sp. HOT171             | 0       | 0   | 0   | 19       | 24  | 27  | <i>Streptococcus peroris</i>                           | 100     | 100 | 100 | 100      | 100 | 100 |
| <i>Actinomyces</i> sp. HOT172             | 49      | 89  | 80  | 98       | 98  | 93  | <i>Streptococcus pneumoniae</i>                        | 100     | 100 | 100 | 100      | 100 | 100 |
| <i>Actinomyces</i> sp. HOT175             | 0       | 0   | 0   | 21       | 19  | 13  | <i>Streptococcus salivarius</i>                        | 100     | 98  | 100 | 100      | 98  | 100 |
| <i>Actinomyces</i> sp. HOT177             | 0       | 9   | 5   | 46       | 25  | 47  | <i>Streptococcus sinensis</i>                          | 100     | 100 | 100 | 96       | 93  | 95  |
| <i>Actinomyces</i> sp. HOT178             | 0       | 0   | 0   | 8        | 3   | 5   | <i>Streptococcus</i> sp. HOT056                        | 100     | 100 | 100 | 98       | 95  | 96  |
| <i>Actinomyces</i> sp. HOT180             | 97      | 100 | 100 | 98       | 100 | 100 | <i>Streptococcus</i> sp. HOT058                        | 100     | 100 | 100 | 100      | 100 | 100 |
| <i>Actinomyces</i> sp. HOT181             | 84      | 100 | 95  | 98       | 97  | 98  | <i>Streptococcus</i> sp. HOT071                        | 100     | 100 | 100 | 100      | 100 | 100 |
| <i>Aggregatibacter aphrophilus</i>        | 0       | 2   | 5   | 12       | 14  | 33  | <i>Streptococcus</i> sp. HOT074                        | 100     | 100 | 100 | 100      | 100 | 100 |
| <i>Aggregatibacter paraphrophilus</i>     | 0       | 0   | 0   | 4        | 8   | 24  | <i>Veillonella dispar</i>                              | 100     | 100 | 100 | 96       | 95  | 96  |
| <i>Aggregatibacter segnis</i>             | 14      | 20  | 15  | 21       | 31  | 31  | <i>Veillonella</i> sp. HOT780                          | 100     | 100 | 100 | 100      | 100 | 100 |
| <i>Aggregatibacter</i> sp. HOT458         | 3       | 0   | 2   | 27       | 24  | 44  | <i>Veillonella atypica</i>                             | 95      | 93  | 98  | 75       | 81  | 71  |
| <i>Aggregatibacter</i> sp. HOT513         | 5       | 13  | 0   | 8        | 17  | 22  | <i>Streptococcus australis</i>                         | 92      | 100 | 98  | 100      | 100 | 100 |
| <i>Aggregatibacter</i> sp. HOT898         | 0       | 0   | 2   | 27       | 31  | 33  | <i>Granulicatella adiacens</i>                         | 92      | 98  | 98  | 100      | 100 | 100 |
| <i>Alloprevotella rava</i>                | 0       | 0   | 2   | 2        | 17  | 7   | <i>Rothia aerea</i>                                    | 92      | 87  | 95  | 100      | 92  | 98  |

|                                     |     |     |     |     |     |     |                                        |    |     |     |     |     |     |
|-------------------------------------|-----|-----|-----|-----|-----|-----|----------------------------------------|----|-----|-----|-----|-----|-----|
| Alloprevotella sp. HOT308           | 24  | 48  | 46  | 52  | 68  | 58  | Streptococcus sp. HOT064               | 92 | 87  | 85  | 62  | 86  | 82  |
| Alloprevotella sp. HOT473           | 100 | 100 | 100 | 100 | 98  | 100 | Streptococcus sp. HOT057               | 89 | 98  | 100 | 90  | 86  | 87  |
| Alloprevotella sp. HOT912           | 0   | 11  | 5   | 6   | 19  | 29  | Streptococcus sp. HOT487               | 86 | 96  | 93  | 100 | 100 | 100 |
| Alloprevotella sp. HOT914           | 16  | 43  | 41  | 94  | 100 | 96  | Actinomyces sp. HOT181                 | 84 | 100 | 95  | 98  | 97  | 98  |
| Alloprevotella tanneriae            | 5   | 2   | 10  | 2   | 20  | 15  | Gemella sanguinis                      | 84 | 96  | 95  | 98  | 100 | 98  |
| Atopobium parvulum                  | 73  | 87  | 98  | 81  | 85  | 89  | Streptococcus gordonii                 | 81 | 96  | 100 | 96  | 95  | 98  |
| Bergeyella sp. HOT322               | 49  | 48  | 51  | 92  | 98  | 100 | Porphyromonas sp. HOT279               | 78 | 89  | 71  | 100 | 100 | 100 |
| Bergeyella sp. HOT900               | 0   | 4   | 0   | 13  | 32  | 24  | Haemophilus sp. HOT036                 | 78 | 83  | 80  | 96  | 100 | 100 |
| Bergeyella sp. HOT907               | 0   | 0   | 7   | 4   | 3   | 15  | Fusobacterium periodonticum            | 73 | 89  | 78  | 100 | 100 | 100 |
| Bifidobacterium breve               | 14  | 0   | 2   | 0   | 0   | 0   | Atopobium parvulum                     | 73 | 87  | 98  | 81  | 85  | 89  |
| Bifidobacterium longum              | 11  | 2   | 2   | 0   | 2   | 0   | Rothia dentocariosa                    | 68 | 63  | 49  | 98  | 98  | 98  |
| Bradyrhizobium elkanii              | 16  | 26  | 15  | 4   | 2   | 5   | Actinomyces graevenitzii               | 62 | 93  | 85  | 90  | 97  | 95  |
| Campylobacter concisus              | 30  | 80  | 90  | 92  | 100 | 95  | Neisseria polysaccharea                | 59 | 63  | 68  | 98  | 100 | 95  |
| Campylobacter gracilis              | 0   | 4   | 5   | 8   | 8   | 7   | Veillonella parvula                    | 57 | 91  | 98  | 98  | 95  | 100 |
| Campylobacter rectus                | 5   | 9   | 10  | 33  | 47  | 51  | Prevotella sp. HOT313                  | 57 | 78  | 88  | 54  | 51  | 67  |
| Capnocytophaga gingivalis           | 0   | 0   | 2   | 33  | 44  | 47  | Fusobacterium nucleatum ss polymorphum | 57 | 70  | 71  | 92  | 97  | 96  |
| Capnocytophaga granulosa            | 0   | 0   | 0   | 15  | 14  | 18  | Actinomyces odontolyticus              | 54 | 37  | 44  | 56  | 71  | 69  |
| Capnocytophaga leadbetteri          | 3   | 2   | 2   | 44  | 53  | 62  | Actinomyces sp. HOT172                 | 49 | 89  | 80  | 98  | 98  | 93  |
| Capnocytophaga sp. HOT332           | 0   | 0   | 0   | 0   | 0   | 5   | Bergeyella sp. HOT322                  | 49 | 48  | 51  | 92  | 98  | 100 |
| Capnocytophaga sp. HOT878           | 0   | 0   | 0   | 6   | 5   | 9   | Streptococcus sp. HOT066               | 49 | 46  | 59  | 52  | 47  | 51  |
| Capnocytophaga sp. HOT901           | 0   | 0   | 0   | 4   | 3   | 9   | Haemophilus haemolyticus               | 43 | 46  | 46  | 96  | 90  | 91  |
| Capnocytophaga sputigena            | 5   | 7   | 2   | 63  | 66  | 65  | Streptococcus sp. HOT423               | 41 | 83  | 61  | 85  | 80  | 69  |
| Cardiobacterium hominis             | 3   | 0   | 2   | 42  | 31  | 49  | Staphylococcus epidermidis             | 38 | 43  | 41  | 21  | 59  | 60  |
| Cardiobacterium valvulum            | 0   | 0   | 0   | 8   | 7   | 9   | Leptotrichia sp. HOT417                | 35 | 76  | 73  | 94  | 93  | 95  |
| Catonella morbi                     | 8   | 20  | 27  | 62  | 78  | 71  | Lactobacillus gasseri                  | 35 | 26  | 22  | 0   | 14  | 7   |
| Clostridiales [F-2][G-1] sp. HOT075 | 0   | 7   | 12  | 54  | 73  | 51  | Lactobacillus rhamnosus                | 35 | 17  | 12  | 0   | 2   | 0   |
| Clostridiales [F-2][G-2] sp. HOT085 | 5   | 7   | 12  | 46  | 49  | 58  | Lachnoanaerobaculum orale              | 32 | 78  | 83  | 60  | 58  | 58  |
| Corynebacterium diphtheriae         | 24  | 33  | 49  | 37  | 39  | 55  | Prevotella sp. HOT299                  | 32 | 63  | 56  | 98  | 100 | 100 |
| Corynebacterium durum               | 11  | 9   | 7   | 62  | 58  | 73  | Campylobacter concisus                 | 30 | 80  | 90  | 92  | 100 | 95  |
| Corynebacterium matruchotii         | 3   | 4   | 0   | 15  | 14  | 16  | Lachnoanaerobaculum umeaense           | 30 | 78  | 76  | 94  | 100 | 96  |
| Corynebacterium mucifaciens         | 8   | 4   | 5   | 2   | 2   | 4   | Prevotella histicola                   | 30 | 50  | 66  | 27  | 34  | 40  |

|                                               |     |     |     |     |     |     |                                             |    |    |    |    |     |    |
|-----------------------------------------------|-----|-----|-----|-----|-----|-----|---------------------------------------------|----|----|----|----|-----|----|
| <i>Corynebacterium urealyticum</i>            | 3   | 2   | 2   | 4   | 2   | 5   | <i>Haemophilus</i> sp. HOT908               | 30 | 39 | 32 | 73 | 83  | 87 |
| <i>Dialister invisus</i>                      | 0   | 0   | 10  | 0   | 14  | 5   | <i>Neisseria subflava</i>                   | 27 | 22 | 22 | 73 | 68  | 75 |
| <i>Dolosigranulum pigrum</i>                  | 0   | 0   | 0   | 2   | 8   | 2   | <i>Ralstonia</i> sp. HOT406                 | 27 | 9  | 10 | 0  | 0   | 0  |
| <i>Eikenella corrodens</i>                    | 0   | 2   | 2   | 33  | 34  | 42  | <i>Alloprevotella</i> sp. HOT308            | 24 | 48 | 46 | 52 | 68  | 58 |
| <i>Enterococcus faecalis</i>                  | 0   | 2   | 0   | 6   | 27  | 27  | <i>Corynebacterium diphtheriae</i>          | 24 | 33 | 49 | 37 | 39  | 55 |
| <i>Eubacterium</i> [XI][G-1] sulci            | 0   | 4   | 12  | 37  | 53  | 44  | <i>Haemophilus</i> sp. HOT035               | 22 | 26 | 12 | 88 | 81  | 85 |
| <i>Eubacterium</i> [XI][G-7] yurii            | 5   | 2   | 15  | 23  | 27  | 27  | <i>Kocuria</i> sp. HOT189                   | 22 | 9  | 20 | 21 | 15  | 23 |
| <i>Finegoldia magna</i>                       | 11  | 0   | 10  | 0   | 2   | 2   | <i>Fusobacterium</i> sp. HOT370             | 19 | 37 | 44 | 85 | 92  | 84 |
| <i>Fusobacterium naviforme</i>                | 11  | 0   | 5   | 12  | 22  | 33  | <i>Lautropia mirabilis</i>                  | 19 | 15 | 5  | 58 | 64  | 84 |
| <i>Fusobacterium nucleatum</i> ss polymorphum | 57  | 70  | 71  | 92  | 97  | 96  | <i>Veillonella rogosae</i>                  | 16 | 52 | 44 | 85 | 97  | 95 |
| <i>Fusobacterium nucleatum</i> ss vincentii   | 14  | 20  | 24  | 25  | 36  | 40  | <i>Alloprevotella</i> sp. HOT914            | 16 | 43 | 41 | 94 | 100 | 96 |
| <i>Fusobacterium nucleatum</i> ss. animalis   | 8   | 17  | 24  | 69  | 75  | 76  | TM7 [G-1] sp. HOT352                        | 16 | 33 | 34 | 62 | 76  | 64 |
| <i>Fusobacterium nucleatum</i> ss. nucleatum  | 5   | 7   | 7   | 8   | 17  | 31  | <i>Bradyrhizobium elkanii</i>               | 16 | 26 | 15 | 4  | 2   | 5  |
| <i>Fusobacterium periodonticum</i>            | 73  | 89  | 78  | 100 | 100 | 100 | <i>Solobacterium moorei</i>                 | 14 | 76 | 90 | 85 | 97  | 95 |
| <i>Fusobacterium</i> sp. HOT370               | 19  | 37  | 44  | 85  | 92  | 84  | <i>Prevotella</i> sp. HOT314                | 14 | 63 | 68 | 62 | 53  | 76 |
| <i>Gemella bergeri</i>                        | 0   | 0   | 0   | 6   | 10  | 13  | <i>Fusobacterium nucleatum</i> ss vincentii | 14 | 20 | 24 | 25 | 36  | 40 |
| <i>Gemella haemolysans</i>                    | 100 | 100 | 100 | 100 | 100 | 100 | <i>Aggregatibacter segnis</i>               | 14 | 20 | 15 | 21 | 31  | 31 |
| <i>Gemella morbillorum</i>                    | 11  | 17  | 12  | 23  | 42  | 53  | <i>Actinomyces cardiffensis</i>             | 14 | 17 | 20 | 15 | 20  | 25 |
| <i>Gemella sanguinis</i>                      | 84  | 96  | 95  | 98  | 100 | 98  | <i>Bifidobacterium breve</i>                | 14 | 0  | 2  | 0  | 0   | 0  |
| GN02 [G-1] sp. HOT872                         | 0   | 0   | 0   | 2   | 2   | 5   | <i>Leptotrichia</i> sp. HOT215              | 11 | 67 | 54 | 94 | 100 | 96 |
| <i>Granulicatella adiacens</i>                | 92  | 98  | 98  | 100 | 100 | 100 | <i>Leptotrichia</i> sp. HOT221              | 11 | 54 | 39 | 85 | 83  | 80 |
| <i>Granulicatella elegans</i>                 | 95  | 100 | 98  | 100 | 100 | 100 | <i>Leptotrichia wadei</i>                   | 11 | 26 | 15 | 21 | 14  | 24 |
| <i>Haemophilus haemolyticus</i>               | 43  | 46  | 46  | 96  | 90  | 91  | <i>Neisseria mucosa</i>                     | 11 | 17 | 34 | 94 | 95  | 95 |
| <i>Haemophilus influenzae</i>                 | 8   | 15  | 15  | 38  | 47  | 60  | <i>Gemella morbillorum</i>                  | 11 | 17 | 12 | 23 | 42  | 53 |
| <i>Haemophilus parainfluenzae</i>             | 97  | 93  | 98  | 100 | 100 | 100 | <i>Staphylococcus caprae</i>                | 11 | 17 | 12 | 0  | 3   | 7  |
| <i>Haemophilus</i> sp. HOT035                 | 22  | 26  | 12  | 88  | 81  | 85  | <i>Actinomyces oris</i>                     | 11 | 15 | 5  | 60 | 56  | 56 |
| <i>Haemophilus</i> sp. HOT036                 | 78  | 83  | 80  | 96  | 100 | 100 | <i>Lachnoanaerobaculum saburreum</i>        | 11 | 9  | 34 | 10 | 8   | 13 |
| <i>Haemophilus</i> sp. HOT908                 | 30  | 39  | 32  | 73  | 83  | 87  | <i>Corynebacterium durum</i>                | 11 | 9  | 7  | 62 | 58  | 73 |
| <i>Kingella denitrificans</i>                 | 0   | 2   | 0   | 56  | 69  | 73  | <i>Prevotella oris</i>                      | 11 | 9  | 7  | 2  | 12  | 7  |
| <i>Kingella kingae</i>                        | 0   | 0   | 0   | 6   | 5   | 4   | <i>Parvimonas micra</i>                     | 11 | 7  | 5  | 4  | 8   | 18 |
| <i>Kingella oralis</i>                        | 8   | 0   | 0   | 33  | 31  | 25  | <i>Streptococcus intermedius</i>            | 11 | 4  | 2  | 10 | 27  | 35 |

|                                  |    |    |    |    |     |    |                                       |    |    |    |    |    |    |
|----------------------------------|----|----|----|----|-----|----|---------------------------------------|----|----|----|----|----|----|
| Kingella sp. HOT012              | 0  | 0  | 0  | 15 | 25  | 29 | Bifidobacterium longum                | 11 | 2  | 2  | 0  | 2  | 0  |
| Kingella sp. HOT459              | 0  | 4  | 0  | 21 | 37  | 42 | Fingoldia magna                       | 11 | 0  | 10 | 0  | 2  | 2  |
| Klebsiella pneumoniae            | 0  | 7  | 0  | 2  | 56  | 51 | Fusobacterium naviforme               | 11 | 0  | 5  | 12 | 22 | 33 |
| Kocuria sp. HOT189               | 22 | 9  | 20 | 21 | 15  | 23 | Stomatobaculum sp. HOT419             | 8  | 52 | 59 | 13 | 14 | 29 |
| Lachnoanaerobaculum orale        | 32 | 78 | 83 | 60 | 58  | 58 | Lachnospiraceae [G-2] sp. HOT096      | 8  | 52 | 56 | 75 | 75 | 82 |
| Lachnoanaerobaculum umeaense     | 30 | 78 | 76 | 94 | 100 | 96 | Prevotella salivae                    | 8  | 48 | 66 | 46 | 73 | 56 |
| Lachnoanaerobaculum saburreum    | 11 | 9  | 34 | 10 | 8   | 13 | Megasphaera micronuciformis           | 8  | 39 | 51 | 13 | 31 | 11 |
| Lachnospiraceae [G-2] sp. HOT088 | 0  | 20 | 22 | 12 | 10  | 20 | Catonella morbi                       | 8  | 20 | 27 | 62 | 78 | 71 |
| Lachnospiraceae [G-2] sp. HOT096 | 8  | 52 | 56 | 75 | 75  | 82 | Leptotrichia sp. HOT463               | 8  | 17 | 27 | 50 | 59 | 47 |
| Lachnospiraceae [G-3] sp. HOT100 | 3  | 0  | 2  | 25 | 53  | 36 | Fusobacterium nucleatum ss. animalis  | 8  | 17 | 24 | 69 | 75 | 76 |
| Lactobacillus gasseri            | 35 | 26 | 22 | 0  | 14  | 7  | Haemophilus influenzae                | 8  | 15 | 15 | 38 | 47 | 60 |
| Lactobacillus rhamnosus          | 35 | 17 | 12 | 0  | 2   | 0  | Stomatobaculum sp. HOT097             | 8  | 11 | 10 | 65 | 80 | 75 |
| Lactococcus lactis               | 3  | 11 | 7  | 10 | 24  | 29 | Staphylococcus aureus                 | 8  | 7  | 7  | 4  | 7  | 9  |
| Lautropia mirabilis              | 19 | 15 | 5  | 58 | 64  | 84 | Corynebacterium mucifaciens           | 8  | 4  | 5  | 2  | 2  | 4  |
| Leptotrichia hofstadii           | 0  | 2  | 0  | 2  | 5   | 5  | Kingella oralis                       | 8  | 0  | 0  | 33 | 31 | 25 |
| Leptotrichia hongkongensis       | 0  | 20 | 5  | 46 | 44  | 47 | Oribacterium sp. HOT108               | 5  | 37 | 44 | 98 | 98 | 89 |
| Leptotrichia shahii              | 5  | 24 | 29 | 21 | 17  | 33 | Leptotrichia sp. HOT462               | 5  | 28 | 17 | 19 | 31 | 24 |
| Leptotrichia sp. HOT212          | 0  | 4  | 5  | 37 | 39  | 55 | Leptotrichia shahii                   | 5  | 24 | 29 | 21 | 17 | 33 |
| Leptotrichia sp. HOT215          | 11 | 67 | 54 | 94 | 100 | 96 | Aggregatibacter sp. HOT513            | 5  | 13 | 0  | 8  | 17 | 22 |
| Leptotrichia sp. HOT218          | 0  | 9  | 7  | 13 | 8   | 11 | Campylobacter rectus                  | 5  | 9  | 10 | 33 | 47 | 51 |
| Leptotrichia sp. HOT219          | 0  | 0  | 0  | 12 | 12  | 11 | Clostridiales [F-2][G-2] sp. HOT085   | 5  | 7  | 12 | 46 | 49 | 58 |
| Leptotrichia sp. HOT221          | 11 | 54 | 39 | 85 | 83  | 80 | Streptococcus anginosus               | 5  | 7  | 12 | 0  | 15 | 13 |
| Leptotrichia sp. HOT223          | 0  | 0  | 2  | 0  | 0   | 0  | Prevotella pallens                    | 5  | 7  | 10 | 19 | 53 | 36 |
| Leptotrichia sp. HOT225          | 0  | 9  | 12 | 38 | 51  | 51 | Fusobacterium nucleatum ss. nucleatum | 5  | 7  | 7  | 8  | 17 | 31 |
| Leptotrichia sp. HOT392          | 0  | 11 | 29 | 73 | 86  | 93 | Capnocytophaga sputigena              | 5  | 7  | 2  | 63 | 66 | 65 |
| Leptotrichia sp. HOT417          | 35 | 76 | 73 | 94 | 93  | 95 | Staphylococcus warneri                | 5  | 7  | 2  | 0  | 2  | 5  |
| Leptotrichia sp. HOT462          | 5  | 28 | 17 | 19 | 31  | 24 | Eubacterium [XI][G-7] yurii           | 5  | 2  | 15 | 23 | 27 | 27 |
| Leptotrichia sp. HOT463          | 8  | 17 | 27 | 50 | 59  | 47 | Moraxella catarrhalis                 | 5  | 2  | 12 | 10 | 8  | 15 |
| Leptotrichia sp. HOT498          | 0  | 15 | 5  | 0  | 7   | 2  | Alloprevotella tannerae               | 5  | 2  | 10 | 2  | 20 | 15 |
| Leptotrichia sp. HOT879          | 0  | 2  | 5  | 31 | 41  | 53 | Neisseria pharyngis                   | 5  | 2  | 7  | 29 | 32 | 33 |
| Leptotrichia wadei               | 11 | 26 | 15 | 21 | 14  | 24 | Selenomonas sp. HOT146                | 5  | 2  | 7  | 2  | 2  | 2  |

|                             |    |     |     |     |     |     |                                  |   |    |    |    |    |    |
|-----------------------------|----|-----|-----|-----|-----|-----|----------------------------------|---|----|----|----|----|----|
| Megasphaera micronuciformis | 8  | 39  | 51  | 13  | 31  | 11  | TM7 [G-1] sp. HOT348             | 5 | 2  | 2  | 0  | 7  | 9  |
| Mogibacterium neglectum     | 3  | 39  | 56  | 33  | 54  | 44  | Scardovia wiggsiae               | 5 | 2  | 2  | 0  | 2  | 4  |
| Moraxella catarrhalis       | 5  | 2   | 12  | 10  | 8   | 15  | Moraxella osloensis              | 5 | 0  | 2  | 0  | 2  | 4  |
| Moraxella osloensis         | 5  | 0   | 2   | 0   | 2   | 4   | Mogibacterium neglectum          | 3 | 39 | 56 | 33 | 54 | 44 |
| Mycoplasma salivarium       | 0  | 2   | 2   | 2   | 17  | 16  | Actinomyces meyeri               | 3 | 35 | 37 | 44 | 37 | 29 |
| Neisseria elongata          | 0  | 2   | 0   | 35  | 56  | 69  | Prevotella veroralis             | 3 | 17 | 17 | 6  | 20 | 9  |
| Neisseria flavescens        | 95 | 100 | 100 | 100 | 100 | 100 | Veillonella sp. HOT917           | 3 | 15 | 27 | 4  | 2  | 4  |
| Neisseria lactamica         | 0  | 0   | 10  | 2   | 8   | 13  | Abiotrophia defectiva            | 3 | 15 | 7  | 69 | 73 | 91 |
| Neisseria mucosa            | 11 | 17  | 34  | 94  | 95  | 95  | Prevotella sp. HOT309            | 3 | 13 | 12 | 6  | 27 | 22 |
| Neisseria oralis            | 0  | 0   | 2   | 40  | 51  | 76  | Prevotella oulorum               | 3 | 11 | 17 | 2  | 14 | 18 |
| Neisseria pharyngis         | 5  | 2   | 7   | 29  | 32  | 33  | Lactococcus lactis               | 3 | 11 | 7  | 10 | 24 | 29 |
| Neisseria polysaccharea     | 59 | 63  | 68  | 98  | 100 | 95  | SR1 [G-1] sp. HOT875             | 3 | 7  | 10 | 56 | 75 | 78 |
| Neisseria sicca             | 0  | 0   | 0   | 29  | 36  | 38  | Actinomyces naeslundii           | 3 | 7  | 5  | 42 | 37 | 51 |
| Neisseria sp. HOT015        | 0  | 0   | 0   | 2   | 8   | 7   | Prevotella intermedia            | 3 | 4  | 5  | 4  | 8  | 4  |
| Neisseria sp. HOT016        | 0  | 2   | 2   | 0   | 8   | 13  | Actinomyces johnsonii            | 3 | 4  | 2  | 31 | 29 | 45 |
| Neisseria sp. HOT018        | 3  | 2   | 7   | 8   | 15  | 9   | Corynebacterium matruchotii      | 3 | 4  | 0  | 15 | 14 | 16 |
| Neisseria sp. HOT020        | 0  | 0   | 0   | 8   | 10  | 7   | Tannerella sp. HOT286            | 3 | 4  | 0  | 8  | 8  | 22 |
| Neisseria sp. HOT499        | 0  | 0   | 0   | 2   | 3   | 5   | Neisseria sp. HOT018             | 3 | 2  | 7  | 8  | 15 | 9  |
| Neisseria subflava          | 27 | 22  | 22  | 73  | 68  | 75  | Prevotella denticola             | 3 | 2  | 7  | 2  | 7  | 7  |
| Neisseria weaveri           | 0  | 0   | 0   | 29  | 36  | 36  | Capnocytophaga leadbetteri       | 3 | 2  | 2  | 44 | 53 | 62 |
| Oribacterium sp. HOT108     | 5  | 37  | 44  | 98  | 98  | 89  | Corynebacterium urealyticum      | 3 | 2  | 2  | 4  | 2  | 5  |
| Ottowia sp. HOT894          | 0  | 0   | 2   | 6   | 8   | 15  | Porphyromonas endodontalis       | 3 | 2  | 2  | 2  | 3  | 4  |
| Parvimonas micra            | 11 | 7   | 5   | 4   | 8   | 18  | Prevotella shahii                | 3 | 0  | 7  | 19 | 34 | 38 |
| Parvimonas sp. HOT393       | 0  | 4   | 0   | 2   | 10  | 5   | Cardiobacterium hominis          | 3 | 0  | 2  | 42 | 31 | 49 |
| Peptococcus sp. HOT168      | 0  | 13  | 7   | 50  | 71  | 64  | Aggregatibacter sp. HOT458       | 3 | 0  | 2  | 27 | 24 | 44 |
| Peptostreptococcus stomatis | 0  | 20  | 20  | 69  | 85  | 78  | Lachnospiraceae [G-3] sp. HOT100 | 3 | 0  | 2  | 25 | 53 | 36 |
| Porphyromonas catoniae      | 0  | 0   | 0   | 8   | 15  | 15  | Selenomonas noxia                | 3 | 0  | 2  | 2  | 2  | 4  |
| Porphyromonas endodontalis  | 3  | 2   | 2   | 2   | 3   | 4   | Actinomyces sp. HOT170           | 3 | 0  | 0  | 12 | 14 | 15 |
| Porphyromonas sp. HOT277    | 0  | 2   | 0   | 2   | 5   | 4   | Streptococcus mutans             | 3 | 0  | 0  | 0  | 7  | 11 |
| Porphyromonas sp. HOT278    | 0  | 0   | 0   | 4   | 2   | 9   | Lachnospiraceae [G-2] sp. HOT088 | 0 | 20 | 22 | 12 | 10 | 20 |
| Porphyromonas sp. HOT279    | 78 | 89  | 71  | 100 | 100 | 100 | Peptostreptococcus stomatis      | 0 | 20 | 20 | 69 | 85 | 78 |

|                           |     |     |     |     |     |     |                                     |   |    |    |    |    |    |
|---------------------------|-----|-----|-----|-----|-----|-----|-------------------------------------|---|----|----|----|----|----|
| Porphyromonas sp. HOT284  | 0   | 4   | 0   | 10  | 12  | 16  | Leptotrichia hongkongensis          | 0 | 20 | 5  | 46 | 44 | 47 |
| Prevotella denticola      | 3   | 2   | 7   | 2   | 7   | 7   | Leptotrichia sp. HOT498             | 0 | 15 | 5  | 0  | 7  | 2  |
| Prevotella histicola      | 30  | 50  | 66  | 27  | 34  | 40  | Peptococcus sp. HOT168              | 0 | 13 | 7  | 50 | 71 | 64 |
| Prevotella intermedia     | 3   | 4   | 5   | 4   | 8   | 4   | Leptotrichia sp. HOT392             | 0 | 11 | 29 | 73 | 86 | 93 |
| Prevotella melaninogenica | 97  | 98  | 100 | 100 | 100 | 100 | Alloprevotella sp. HOT912           | 0 | 11 | 5  | 6  | 19 | 29 |
| Prevotella oris           | 11  | 9   | 7   | 2   | 12  | 7   | Leptotrichia sp. HOT225             | 0 | 9  | 12 | 38 | 51 | 51 |
| Prevotella oulorum        | 3   | 11  | 17  | 2   | 14  | 18  | Leptotrichia sp. HOT218             | 0 | 9  | 7  | 13 | 8  | 11 |
| Prevotella pallens        | 5   | 7   | 10  | 19  | 53  | 36  | Actinomyces sp. HOT177              | 0 | 9  | 5  | 46 | 25 | 47 |
| Prevotella saccharolytica | 0   | 0   | 0   | 2   | 3   | 4   | Clostridiales [F-2][G-1] sp. HOT075 | 0 | 7  | 12 | 54 | 73 | 51 |
| Prevotella salivae        | 8   | 48  | 66  | 46  | 73  | 56  | Prevotella sp. HOT396               | 0 | 7  | 7  | 17 | 46 | 49 |
| Prevotella scopos         | 0   | 2   | 0   | 15  | 27  | 20  | Selenomonas sp. HOT136              | 0 | 7  | 2  | 2  | 5  | 5  |
| Prevotella shahii         | 3   | 0   | 7   | 19  | 34  | 38  | Klebsiella pneumoniae               | 0 | 7  | 0  | 2  | 56 | 51 |
| Prevotella sp. HOT299     | 32  | 63  | 56  | 98  | 100 | 100 | Eubacterium [XI][G-1] sulci         | 0 | 4  | 12 | 37 | 53 | 44 |
| Prevotella sp. HOT305     | 0   | 2   | 7   | 2   | 2   | 2   | TM7 [G-3] sp. HOT351                | 0 | 4  | 10 | 6  | 8  | 7  |
| Prevotella sp. HOT309     | 3   | 13  | 12  | 6   | 27  | 22  | Selenomonas sp. HOT149              | 0 | 4  | 10 | 6  | 7  | 16 |
| Prevotella sp. HOT310     | 0   | 4   | 2   | 12  | 31  | 29  | Simonsiella muelleri                | 0 | 4  | 7  | 35 | 31 | 33 |
| Prevotella sp. HOT313     | 57  | 78  | 88  | 54  | 51  | 67  | Leptotrichia sp. HOT212             | 0 | 4  | 5  | 37 | 39 | 55 |
| Prevotella sp. HOT314     | 14  | 63  | 68  | 62  | 53  | 76  | Campylobacter gracilis              | 0 | 4  | 5  | 8  | 8  | 7  |
| Prevotella sp. HOT317     | 0   | 0   | 5   | 2   | 3   | 4   | Veillonella denticariosi            | 0 | 4  | 5  | 2  | 10 | 5  |
| Prevotella sp. HOT396     | 0   | 7   | 7   | 17  | 46  | 49  | Prevotella sp. HOT310               | 0 | 4  | 2  | 12 | 31 | 29 |
| Prevotella veroralis      | 3   | 17  | 17  | 6   | 20  | 9   | Kingella sp. HOT459                 | 0 | 4  | 0  | 21 | 37 | 42 |
| Ralstonia sp. HOT406      | 27  | 9   | 10  | 0   | 0   | 0   | Bergeyella sp. HOT900               | 0 | 4  | 0  | 13 | 32 | 24 |
| Rothia aeria              | 92  | 87  | 95  | 100 | 92  | 98  | Porphyromonas sp. HOT284            | 0 | 4  | 0  | 10 | 12 | 16 |
| Rothia dentocariosa       | 68  | 63  | 49  | 98  | 98  | 98  | Yersinia pestis                     | 0 | 4  | 0  | 2  | 15 | 18 |
| Rothia mucilaginosa       | 100 | 100 | 100 | 100 | 100 | 100 | Parvimonas sp. HOT393               | 0 | 4  | 0  | 2  | 10 | 5  |
| Scardovia wiggisiae       | 5   | 2   | 2   | 0   | 2   | 4   | Prevotella sp. HOT305               | 0 | 2  | 7  | 2  | 2  | 2  |
| Selenomonas infelix       | 0   | 2   | 0   | 2   | 5   | 0   | Leptotrichia sp. HOT879             | 0 | 2  | 5  | 31 | 41 | 53 |
| Selenomonas noxia         | 3   | 0   | 2   | 2   | 2   | 4   | Aggregatibacter aphrophilus         | 0 | 2  | 5  | 12 | 14 | 33 |
| Selenomonas sp. HOT126    | 0   | 0   | 0   | 2   | 2   | 2   | Selenomonas sp. HOT478              | 0 | 2  | 5  | 0  | 5  | 2  |
| Selenomonas sp. HOT136    | 0   | 7   | 2   | 2   | 5   | 5   | Eikenella corrodens                 | 0 | 2  | 2  | 33 | 34 | 42 |
| Selenomonas sp. HOT146    | 5   | 2   | 7   | 2   | 2   | 2   | Mycoplasma salivarium               | 0 | 2  | 2  | 2  | 17 | 16 |

|                                |     |     |     |     |     |     |                            |   |   |    |    |    |    |
|--------------------------------|-----|-----|-----|-----|-----|-----|----------------------------|---|---|----|----|----|----|
| Selenomonas sp. HOT149         | 0   | 4   | 10  | 6   | 7   | 16  | Neisseria sp. HOT016       | 0 | 2 | 2  | 0  | 8  | 13 |
| Selenomonas sp. HOT478         | 0   | 2   | 5   | 0   | 5   | 2   | Kingella denitrificans     | 0 | 2 | 0  | 56 | 69 | 73 |
| Selenomonas sp. HOT892         | 0   | 0   | 0   | 0   | 2   | 7   | Neisseria elongata         | 0 | 2 | 0  | 35 | 56 | 69 |
| Selenomonas sputigena          | 0   | 0   | 2   | 0   | 8   | 7   | Prevotella scopos          | 0 | 2 | 0  | 15 | 27 | 20 |
| Simonsiella muelleri           | 0   | 4   | 7   | 35  | 31  | 33  | TM7 [G-1] sp. HOT347       | 0 | 2 | 0  | 13 | 12 | 22 |
| Solobacterium moorei           | 14  | 76  | 90  | 85  | 97  | 95  | Enterococcus faecalis      | 0 | 2 | 0  | 6  | 27 | 27 |
| SR1 [G-1] sp. HOT875           | 3   | 7   | 10  | 56  | 75  | 78  | Leptotrichia hofstadii     | 0 | 2 | 0  | 2  | 5  | 5  |
| Staphylococcus aureus          | 8   | 7   | 7   | 4   | 7   | 9   | Porphyromonas sp. HOT277   | 0 | 2 | 0  | 2  | 5  | 4  |
| Staphylococcus caprae          | 11  | 17  | 12  | 0   | 3   | 7   | Selenomonas infelix        | 0 | 2 | 0  | 2  | 5  | 0  |
| Staphylococcus epidermidis     | 38  | 43  | 41  | 21  | 59  | 60  | Neisseria lactamica        | 0 | 0 | 10 | 2  | 8  | 13 |
| Staphylococcus warneri         | 5   | 7   | 2   | 0   | 2   | 5   | Dialister invisus          | 0 | 0 | 10 | 0  | 14 | 5  |
| Stomatobaculum sp. HOT097      | 8   | 11  | 10  | 65  | 80  | 75  | Bergeyella sp. HOT907      | 0 | 0 | 7  | 4  | 3  | 15 |
| Stomatobaculum sp. HOT419      | 8   | 52  | 59  | 13  | 14  | 29  | Streptococcus agalactiae   | 0 | 0 | 7  | 0  | 2  | 0  |
| Streptococcus agalactiae       | 0   | 0   | 7   | 0   | 2   | 0   | Prevotella sp. HOT317      | 0 | 0 | 5  | 2  | 3  | 4  |
| Streptococcus anginosus        | 5   | 7   | 12  | 0   | 15  | 13  | Neisseria oralis           | 0 | 0 | 2  | 40 | 51 | 76 |
| Streptococcus australis        | 92  | 100 | 98  | 100 | 100 | 100 | Capnocytophaga gingivalis  | 0 | 0 | 2  | 33 | 44 | 47 |
| Streptococcus gordonii         | 81  | 96  | 100 | 96  | 95  | 98  | Aggregatibacter sp. HOT898 | 0 | 0 | 2  | 27 | 31 | 33 |
| Streptococcus intermedius      | 11  | 4   | 2   | 10  | 27  | 35  | Ottowia sp. HOT894         | 0 | 0 | 2  | 6  | 8  | 15 |
| Streptococcus mutans           | 3   | 0   | 0   | 0   | 7   | 11  | TM7 [G-1] sp. HOT353       | 0 | 0 | 2  | 6  | 7  | 16 |
| Streptococcus oligofermentans  | 100 | 100 | 100 | 100 | 100 | 100 | Actinomyces massiliensis   | 0 | 0 | 2  | 4  | 2  | 9  |
| Streptococcus oralis           | 100 | 100 | 100 | 100 | 100 | 100 | Alloprevotella rava        | 0 | 0 | 2  | 2  | 17 | 7  |
| Streptococcus parasanguinis I  | 97  | 100 | 95  | 100 | 100 | 98  | Actinomyces radidentis     | 0 | 0 | 2  | 2  | 0  | 0  |
| Streptococcus parasanguinis II | 100 | 100 | 100 | 98  | 97  | 98  | Selenomonas sputigena      | 0 | 0 | 2  | 0  | 8  | 7  |
| Streptococcus peroris          | 100 | 100 | 100 | 100 | 100 | 100 | Leptotrichia sp. HOT223    | 0 | 0 | 2  | 0  | 0  | 0  |
| Streptococcus pneumoniae       | 100 | 100 | 100 | 100 | 100 | 100 | Neisseria sicca            | 0 | 0 | 0  | 29 | 36 | 38 |
| Streptococcus salivarius       | 100 | 98  | 100 | 100 | 98  | 100 | Neisseria weaveri          | 0 | 0 | 0  | 29 | 36 | 36 |
| Streptococcus sinensis         | 100 | 100 | 100 | 96  | 93  | 95  | Actinomyces sp. HOT175     | 0 | 0 | 0  | 21 | 19 | 13 |
| Streptococcus sp. HOT056       | 100 | 100 | 100 | 98  | 95  | 96  | Actinomyces sp. HOT171     | 0 | 0 | 0  | 19 | 24 | 27 |
| Streptococcus sp. HOT057       | 89  | 98  | 100 | 90  | 86  | 87  | Kingella sp. HOT012        | 0 | 0 | 0  | 15 | 25 | 29 |
| Streptococcus sp. HOT058       | 100 | 100 | 100 | 100 | 100 | 100 | Capnocytophaga granulosa   | 0 | 0 | 0  | 15 | 14 | 18 |
| Streptococcus sp. HOT064       | 92  | 87  | 85  | 62  | 86  | 82  | Leptotrichia sp. HOT219    | 0 | 0 | 0  | 12 | 12 | 11 |

|                          |     |     |     |     |     |     |                                |   |   |   |   |    |    |
|--------------------------|-----|-----|-----|-----|-----|-----|--------------------------------|---|---|---|---|----|----|
| Streptococcus sp. HOT066 | 49  | 46  | 59  | 52  | 47  | 51  | Porphyromonas catoniae         | 0 | 0 | 0 | 8 | 15 | 15 |
| Streptococcus sp. HOT071 | 100 | 100 | 100 | 100 | 100 | 100 | Neisseria sp. HOT020           | 0 | 0 | 0 | 8 | 10 | 7  |
| Streptococcus sp. HOT074 | 100 | 100 | 100 | 100 | 100 | 100 | Actinomyces naeslundii II      | 0 | 0 | 0 | 8 | 8  | 5  |
| Streptococcus sp. HOT423 | 41  | 83  | 61  | 85  | 80  | 69  | Cardiobacterium valvulum       | 0 | 0 | 0 | 8 | 7  | 9  |
| Streptococcus sp. HOT487 | 86  | 96  | 93  | 100 | 100 | 100 | Actinomyces sp. HOT178         | 0 | 0 | 0 | 8 | 3  | 5  |
| Tannerella sp. HOT286    | 3   | 4   | 0   | 8   | 8   | 22  | Tannerella sp. HOT808          | 0 | 0 | 0 | 6 | 17 | 11 |
| Tannerella sp. HOT808    | 0   | 0   | 0   | 6   | 17  | 11  | Gemella bergeri                | 0 | 0 | 0 | 6 | 10 | 13 |
| TM7 [G-1] sp. HOT346     | 0   | 0   | 0   | 0   | 3   | 4   | Capnocytophaga sp. HOT878      | 0 | 0 | 0 | 6 | 5  | 9  |
| TM7 [G-1] sp. HOT347     | 0   | 2   | 0   | 13  | 12  | 22  | Kingella kingae                | 0 | 0 | 0 | 6 | 5  | 4  |
| TM7 [G-1] sp. HOT348     | 5   | 2   | 2   | 0   | 7   | 9   | Aggregatibacter paraphrophilus | 0 | 0 | 0 | 4 | 8  | 24 |
| TM7 [G-1] sp. HOT352     | 16  | 33  | 34  | 62  | 76  | 64  | Capnocytophaga sp. HOT901      | 0 | 0 | 0 | 4 | 3  | 9  |
| TM7 [G-1] sp. HOT353     | 0   | 0   | 2   | 6   | 7   | 16  | Porphyromonas sp. HOT278       | 0 | 0 | 0 | 4 | 2  | 9  |
| TM7 [G-3] sp. HOT351     | 0   | 4   | 10  | 6   | 8   | 7   | Neisseria sp. HOT015           | 0 | 0 | 0 | 2 | 8  | 7  |
| Treponema vincentii      | 0   | 0   | 0   | 0   | 12  | 7   | Dolosigranulum pigrum          | 0 | 0 | 0 | 2 | 8  | 2  |
| Veillonella atypica      | 95  | 93  | 98  | 75  | 81  | 71  | Neisseria sp. HOT499           | 0 | 0 | 0 | 2 | 3  | 5  |
| Veillonella denticariosi | 0   | 4   | 5   | 2   | 10  | 5   | Prevotella saccharolytica      | 0 | 0 | 0 | 2 | 3  | 4  |
| Veillonella dispar       | 100 | 100 | 100 | 96  | 95  | 96  | GN02 [G-1] sp. HOT872          | 0 | 0 | 0 | 2 | 2  | 5  |
| Veillonella parvula      | 57  | 91  | 98  | 98  | 95  | 100 | Selenomonas sp. HOT126         | 0 | 0 | 0 | 2 | 2  | 2  |
| Veillonella rogosae      | 16  | 52  | 44  | 85  | 97  | 95  | Treponema vincentii            | 0 | 0 | 0 | 0 | 12 | 7  |
| Veillonella sp. HOT780   | 100 | 100 | 100 | 100 | 100 | 100 | TM7 [G-1] sp. HOT346           | 0 | 0 | 0 | 0 | 3  | 4  |
| Veillonella sp. HOT917   | 3   | 15  | 27  | 4   | 2   | 4   | Selenomonas sp. HOT892         | 0 | 0 | 0 | 0 | 2  | 7  |
| Yersinia pestis          | 0   | 4   | 0   | 2   | 15  | 18  | Capnocytophaga sp. HOT332      | 0 | 0 | 0 | 0 | 0  | 5  |
