# Supplementary material for: Oral Microbiota in Infants Fed a Formula Supplemented with Bovine Milk Fat Globule Membranes - A Randomized Controlled Trial
Source: PubMed Central journal article supplement (PMC5242539; doi:10.1371/journal.pone.0169831), 2017-01-18
Supplement: pone.0169831.s006.pdf [file pone.0169831.s006.pdf]

**S3 Table. PLS correlation coefficients for taxa and biological covariates with a statistically significant correlation.** Statistical significance is indicated by that the PLS correlation coeff (Corr) 95% CI does not include zero. Text highlighted in grey refers to taxa with a correlation coefficient >0.1 and (G) to the genus level.

Q<sup>2</sup>=cross validated predicitive value of the model.

| EF versus SF group            |        |                                     |        | BFR versus no BFR                  |        |                            |        |
|-------------------------------|--------|-------------------------------------|--------|------------------------------------|--------|----------------------------|--------|
| 4 month (Q2=0.15)             |        | 12 month (Q2=0.05)                  |        | 4 month (Q2=0.57)                  |        | 12 month (Q2=0.30)         |        |
| EF Factor                     | Corr   | EF Factor                           | Corr   | BFR Factor                         | Corr   | BFR Factor                 | Corr   |
| Aggregatibacter sp. HOT513    | 0.140  | Megasphaera (G)                     | 0.138  | <b>yes</b> Lactobacillus (culture) | 0.116  | <b>yes</b> Rothia aeria    | 0.063  |
| Streptococcus sp. HOT423      | 0.132  | Megasphaera micronuciformis         | 0.138  | Bifidobacterium (G)                | 0.106  | Streptococcus sp. HOT423   | 0.055  |
| Porphyromonas (G)             | 0.126  | Clostridiales [F-2][G-1] sp. HOT075 | 0.124  | Bifidobacterium breve              | 0.086  | Oribacterium (G)           | 0.044  |
| Porphyromonas sp. HOT279      | 0.126  | Clostridiales[F-2][G-1] (G)         | 0.124  | Kingella oralis                    | 0.079  | Oribacterium sp. HOT108    | 0.044  |
| Klebsiella (G)                | 0.097  | Oribacterium (G)                    | 0.107  | Ralstonia (G)                      | 0.076  | Actinomyces sp. HOT172     | 0.030  |
| Klebsiella pneumoniae         | 0.097  | Oribacterium sp. HOT108             | 0.107  | Ralstonia sp. HOT406               | 0.076  |                            |        |
| Actinomyces oris              | 0.093  | Prevotella pallens                  | 0.096  | Lactobacillus rhamnosus            | 0.074  |                            |        |
| Rothia dentocariosa           | 0.078  | Neisseria polysaccharea             | 0.095  | Lactobacillus (G)                  | 0.055  |                            |        |
| Leptotrichia wadei            | 0.077  | Prevotella salivae                  | 0.094  | Sex                                | 0.040  |                            |        |
| Abiotrophia (G)               | 0.068  | Lachnospiraceae [G-3] (G)           | 0.087  | Lactobacillus gasseri              | 0.037  |                            |        |
| Abiotrophia defectiva         | 0.068  | Lachnospiraceae [G-3] sp. HOT100    | 0.087  |                                    |        |                            |        |
| Sex                           | 0.021  | Dolosigranulum (G)                  | 0.085  | <b>no</b>                          |        | <b>no</b>                  |        |
|                               |        | Dolosigranulum pigrum               | 0.085  | Solobacterium (G)                  | -0.214 | Klebsiella (G)             | -0.235 |
|                               |        | Alloprevotella rava                 | 0.085  | Solobacterium moorei               | -0.214 | Klebsiella pneumoniae      | -0.235 |
|                               |        | Lactobacillus (G)                   | 0.072  | Leptotrichia (G)                   | -0.187 | Staphylococcus (G)         | -0.172 |
|                               |        | Lactobacillus gasseri               | 0.059  | Campylobacter concisus             | -0.178 | Staphylococcus epidermidis | -0.170 |
|                               |        |                                     |        | Campylobacter (G)                  | -0.176 | Prevotella sp. HOT396      | -0.139 |
| <b>SF</b>                     |        | <b>SF</b>                           |        | Prevotella sp. HOT314              | -0.156 | Neisseria elongata         | -0.122 |
| Lachnoanaerobaculum saburreum | -0.171 | Neisseria oralis                    | -0.153 | Lachnoanaerobaculum orale          | -0.152 | Prevotella pallens         | -0.119 |
| Dialister (G)                 | -0.127 | Prevotella sp. HOT314               | -0.144 | Leptotrichia sp. HOT215            | -0.151 | Streptococcus sp. HOT064   | -0.119 |
| Dialister invisus             | -0.127 | Aggregatibacter aphrophilus         | -0.140 | Veillonella parvula                | -0.150 | Enterococcus (G)           | -0.115 |
| Finegoldia (G)                | -0.127 | Actinomyces sp. HOT177              | -0.136 | Lachnoanaerobaculum umeaense       | -0.147 | Enterococcus faecalis      | -0.115 |
| Finegoldia magna              | -0.127 | Abiotrophia (G)                     | -0.133 | Prevotella salivae                 | -0.146 | Gemella morbillorum        | -0.108 |
| Neisseria lactamica           | -0.127 | Abiotrophia defectiva               | -0.133 | Moryella sp. HOT419                | -0.143 | Prevotella sp. HOT309      | -0.108 |
| Leptotrichia sp. HOT392       | -0.126 | Bergeyella sp. HOT907               | -0.133 | Lachnoanaerobaculum (G)            | -0.142 | Streptococcus intermedius  | -0.107 |

|                             |        |                                          |        |                                  |        |                                          |        |
|-----------------------------|--------|------------------------------------------|--------|----------------------------------|--------|------------------------------------------|--------|
| Eubacterium [11][G-7] (G)   | -0.125 | Aggregatibacter paraphrophilus           | -0.131 | Mogibacterium (G)                | -0.141 | Alloprevotella tannerae                  | -0.105 |
| Eubacterium [XI][G-7] yurii | -0.125 | Aggregatibacter sp. HOT458               | -0.127 | Mogibacterium neglectum          | -0.141 | Streptococcus anginosus                  | -0.103 |
| Streptococcus agalactiae    | -0.109 | Lautropia (G)                            | -0.126 | Lachnospiraceae [G-2] sp. HOT096 | -0.140 | Yersinia (G)                             | -0.101 |
| Moraxella (G)               | -0.108 | Lautropia mirabilis                      | -0.126 | Lachnospiraceae[G-2] (G)         | -0.140 | Yersinia pestis                          | -0.101 |
| Moraxella catarrhalis       | -0.108 | Porphyromonas sp. HOT278                 | -0.124 | Stomatobaculum (G)               | -0.127 | Alloprevotella sp. HOT912                | -0.101 |
| Atopobium (G)               | -0.106 | Cardiobacterium (G)                      | -0.123 | Actinomyces sp. HOT172           | -0.125 | Neisseria oralis                         | -0.100 |
| Atopobium parvulum          | -0.106 | Aggregatibacter (G)                      | -0.120 | Leptotrichia sp. HOT417          | -0.123 | Leptotrichia sp. HOT392                  | -0.099 |
| Solobacterium (G)           | -0.102 | Tannerella sp. HOT286                    | -0.120 | Megasphaera (G)                  | -0.116 | SR1 [G-1] sp. HOT875                     | -0.098 |
| Solobacterium moorei        | -0.102 | Moryella sp. HOT419                      | -0.119 | Megasphaera micronuciformis      | -0.116 | SR1[G-1] (G)                             | -0.098 |
| Prevotella salivae          | -0.099 | Cardiobacterium hominis                  | -0.114 | Oribacterium (G)                 | -0.114 | Mycoplasma (G)                           | -0.097 |
| Prevotella histicola        | -0.087 | Selenomonas sp. HOT892                   | -0.110 | Oribacterium sp. HOT108          | -0.114 | Mycoplasma salivarium                    | -0.097 |
| Selenomonas (G)             | -0.082 | Actinomyces johnsonii                    | -0.104 | Leptotrichia sp. HOT221          | -0.113 | Prevotella sp. HOT310                    | -0.096 |
| Campylobacter concisus      | -0.075 | TM7 [G-1] sp. HOT353                     | -0.102 | Actinomyces meyeri               | -0.113 | Selenomonas (G)                          | -0.096 |
| Lachnoanaerobaculum (G)     | -0.073 | Actinomyces massiliensis                 | -0.092 | Actinomyces graevenitzii         | -0.106 | Lactobacillus (G)                        | -0.095 |
| Veillonella parvula         | -0.073 | Fusobacterium nucleatum<br>ss. nucleatum | -0.090 | Streptococcus sp. HOT423         | -0.099 | Prevotella oulorum                       | -0.093 |
| Megasphaera (G)             | -0.066 | Leptotrichia wadei                       | -0.085 | Veillonella rogosae              | -0.099 | Fusobacterium nucleatum<br>ss. nucleatum | -0.092 |
| Megasphaera micronuciformis | -0.066 | Leptotrichia sp. HOT212                  | -0.084 | Streptococcus gordonii           | -0.096 | Lactococcus lactis                       | -0.092 |
|                             |        | Actinomyces naeslundii                   | -0.083 | Prevotella sp. HOT313            | -0.090 | Lactobacillus gasseri                    | -0.091 |
|                             |        | Moraxella (G)                            | -0.063 | Lachnospiraceae [G-2] sp. HOT088 | -0.088 | Caesarean                                | -0.089 |
|                             |        | Clostridiales [F-2][G-2] sp. HOT085      | -0.056 | Leptotrichia sp. HOT392          | -0.085 | Bergeyella (G)                           | -0.088 |
|                             |        | Clostridiales[F-2][G-2] (G)              | -0.056 | Peptostreptococcus (G)           | -0.085 | Bergeyella sp. HOT322                    | -0.088 |
|                             |        | Eikenella (G)                            | -0.053 | Peptostreptococcus stomatis      | -0.085 | Campylobacter                            | -0.088 |
|                             |        | Eikenella corrodens                      | -0.053 | Actinomyces sp. HOT181           | -0.085 | Lachnospiraceae [G-3] (G)                | -0.088 |
|                             |        | Prevotella histicola                     | -0.042 | Prevotella histicola             | -0.083 | Lachnospiraceae [G-3] sp.<br>HOT100      | -0.088 |
|                             |        |                                          |        | Alloprevotella sp. HOT914        | -0.083 | Kingella sp. HOT459                      | -0.088 |
|                             |        |                                          |        | Atopobium (G)                    | -0.083 | Dialister (G)                            | -0.087 |
|                             |        |                                          |        | Atopobium parvulum               | -0.083 | Dialister invisus                        | -0.087 |
|                             |        |                                          |        | Prevotella sp. HOT299            | -0.082 | Neisseria sp. HOT016                     | -0.087 |
|                             |        |                                          |        | Leptotrichia shahii              | -0.079 | Treponema (G)                            | -0.087 |
|                             |        |                                          |        | Veillonella sp. HOT917           | -0.075 | Treponema vincentii                      | -0.087 |

|                                     |        |                                         |        |
|-------------------------------------|--------|-----------------------------------------|--------|
| Streptococcus sp. HOT057            | -0.074 | Parvimonas (G)                          | -0.085 |
| TM7[G-1] (G)                        | -0.070 | Aggregatibacter                         | -0.083 |
| Alloprevotella sp. HOT308           | -0.070 | Prevotella salivae                      | -0.083 |
| Leptotrichia sp. HOT462             | -0.069 | Streptococcus mutans                    | -0.082 |
| Fusobacterium sp. HOT370            | -0.067 | Prevotella shahii                       | -0.082 |
| Leptotrichia hongkongensis          | -0.067 | Alloprevotella rava                     | -0.081 |
| Prevotella veroralis                | -0.065 | Fusobacterium naviforme                 | -0.081 |
| Leptotrichia sp. HOT225             | -0.060 | Aggregatibacter<br>paraphrophilus       | -0.078 |
| Leptotrichia sp. HOT498             | -0.060 | Mogibacterium (G)                       | -0.075 |
| Peptococcus (G)                     | -0.060 | Mogibacterium neglectum                 | -0.075 |
| Peptococcus sp. HOT168              | -0.060 | Lautropia (G)                           | -0.075 |
| Streptococcus australis             | -0.059 | Lautropia mirabilis                     | -0.075 |
| Caesarean                           | -0.058 | Bergeyella sp. HOT900                   | -0.074 |
| Catonella (G)                       | -0.057 | Selenomonas sputigena                   | -0.073 |
| Catonella morbi                     | -0.057 | TM7 [G-1] sp. HOT348                    | -0.073 |
| TM7 [G-1] sp. HOT352                | -0.057 | Aggregatibacter sp. HOT513              | -0.072 |
| Clostridiales [F-2][G-1] sp. HOT075 | -0.056 | Neisseria lactamica                     | -0.072 |
| Clostridiales[F-2][G-1] (G)         | -0.056 | Campylobacter rectus                    | -0.072 |
| Prevotella oulorum                  | -0.054 | Actinomyces odontolyticus               | -0.070 |
| Leptotrichia sp. HOT463             | -0.054 | Kingella denitrificans                  | -0.070 |
| Neisseria mucosa                    | -0.053 | Parvimonas micra                        | -0.069 |
| Alloprevotella sp. HOT912           | -0.052 | Haemophilus influenzae                  | -0.065 |
| Prevotella sp. HOT309               | -0.050 | Staphylococcus caprae                   | -0.063 |
| Corynebacterium diphtheriae         | -0.050 | Prevotella oris                         | -0.062 |
| Actinomyces sp. HOT177              | -0.048 | Fusobacterium nucleatum<br>ss vincentii | -0.061 |
| Prevotella sp. HOT396               | -0.048 | Aggregatibacter aphrophilus             | -0.060 |
| Selenomonas sp. HOT149              | -0.048 | Prevotella veroralis                    | -0.058 |
| TM7 [G-3] sp. HOT351                | -0.048 | Tannerella sp. HOT808                   | -0.058 |
| TM7[G-3] (G)                        | -0.048 | Veillonella denticariosi                | -0.056 |
| Simonsiella (G)                     | -0.044 | Capnocytophaga leadbetteri              | -0.055 |
| Simonsiella muelleri                | -0.044 | Leptotrichia sp. HOT498                 | -0.051 |

|                                         |        |                             |        |
|-----------------------------------------|--------|-----------------------------|--------|
| Fusobacterium periodonticum             | -0.041 | Selenomonas sp. HOT478      | -0.051 |
| Campylobacter gracilis                  | -0.039 | Selenomonas sp. HOT892      | -0.051 |
| Dialister (G)                           | -0.039 | Staphylococcus warneri      | -0.051 |
| Dialister invisus                       | -0.039 | TM7 [G-1] sp. HOT346        | -0.051 |
| Neisseria lactamica                     | -0.039 | Neisseria sp. HOT015        | -0.050 |
| Prevotella sp. HOT305                   | -0.039 | Prevotella denticola        | -0.050 |
| Selenomonas sp. HOT136                  | -0.039 | Corynebacterium diphtheriae | -0.046 |
| Lachnoanaerobaculum saburreum           | -0.039 | Prevotella scopos           | -0.046 |
| Klebsiella (G)                          | -0.034 | Moraxella osloensis         | -0.044 |
| Klebsiella pneumoniae                   | -0.034 | Scardovia (G)               | -0.044 |
| Leptotrichia sp. HOT879                 | -0.034 | Scardovia wiggsiae          | -0.044 |
| Prevotella sp. HOT310                   | -0.034 |                             |        |
| Selenomonas sp. HOT478                  | -0.034 |                             |        |
| Streptococcus agalactiae                | -0.034 |                             |        |
| SR1 [G-1] sp. HOT875                    | -0.033 |                             |        |
| SR1[G-1] (G)                            | -0.033 |                             |        |
| Fusobacterium nucleatum ss<br>vincentii | -0.032 |                             |        |

---
